## 1 Weak catch bonds make strong networks

2 Yuval Mulla<sup>1,2</sup>, Mario J Avellaneda<sup>1</sup>, Antoine Roland<sup>1</sup>, Lucia Baldauf<sup>1,3</sup>, Sander J Tans<sup>1,3\*</sup>, Gijsje H  
3 Koenderink<sup>1,3\*</sup>

4  
5 <sup>1</sup> Living Matter Department, AMOLF, Amsterdam, The Netherlands

6 <sup>2</sup> Institute for Biological Physics, University of Cologne, Cologne, Germany

7 <sup>3</sup> Department of Bionanoscience, Kavli Institute of Nanoscience Delft, Delft University of Technology,  
8 Delft 2629HZ, the Netherlands

9 \*Correspondence to: [g.h.koenderink@tudelft.nl](mailto:g.h.koenderink@tudelft.nl), [tans@amolf.nl](mailto:tans@amolf.nl)

10  
11 **Molecular catch bonds are ubiquitous in biology and well-studied in the**  
12 **context of leukocyte extravasion<sup>1</sup>, cellular mechanosensing<sup>2,3</sup>, and urinary tract**  
13 **infection<sup>4</sup>. Unlike normal (slip) bonds, catch bonds strengthen under tension.**  
14 **The current paradigm is that this remarkable ability enables cells to increase**  
15 **their adhesion in fast fluid flows<sup>1,4</sup>, and hence provides 'strength-on-demand'.**  
16 **Recently, cytoskeletal crosslinkers have been discovered that also display**  
17 **catch bonding<sup>5-8</sup>. It has been suggested that they strengthen cells, following**  
18 **the strength-on-demand paradigm<sup>9,10</sup>. However, catch bonds tend to be weaker**  
19 **compared to regular (slip) bonds because they have cryptic binding sites that**  
20 **are often inactive<sup>11-13</sup>. Therefore, the role of catch bonding in the cytoskeleton**  
21 **remains unclear. Here we reconstitute cytoskeletal actin networks to show that**  
22 **catch bonds render them both stronger and more deformable than slip bonds,**  
23 **even though the bonds themselves are weaker. We develop a model to show**  
24 **that weak binding allows the catch bonds to mitigate crack initiation by moving**  
25 **from low- to high-tension areas in response to mechanical loading. By**  
26 **contrast, slip bonds remain trapped in stress-free areas. We therefore propose**  
27 **that the mechanism of catch bonding is typified by dissociation-on-demand**  
28 **rather than strength-on-demand. Dissociation-on-demand can explain how**  
29 **both cytolinkers<sup>5-8,10,14,15</sup> and adhesins<sup>1,2,4,12,16-20</sup> exploit continuous**  
30 **redistribution to combine mechanical strength with the adaptability required**  
31 **for movement and proliferation<sup>21</sup>. Our findings provide a mechanistic**  
32 **understanding of diseases where catch bonding is compromised<sup>11,12</sup> such as**  
33 **kidney focal segmental glomerulosclerosis<sup>22,23</sup>, caused by the  $\alpha$ -actinin-4**  
34 **mutant studied here. Moreover, catch bonds provide a route towards creating**  
35 **life-like materials that combine strength with deformability<sup>24</sup>.**

36 Here we exploit the actin-binding protein  $\alpha$ -actinin-4 and its K225E point mutant, associated  
37 with the heritable disease kidney focal segmental glomerulosclerosis type 1<sup>22,25</sup>, to identify  
38 the role of catch bonds in the mechanical properties of actin networks. Actin networks are  
39 key determinants of cell mechanics, together with other cytoskeletal proteins. To isolate the  
40 role of catch bonds in actin mechanics, we reconstitute actin networks from purified  
41 components. We first characterized the binding affinity of the two protein variants for actin

42 filaments in the absence of mechanical load. Co-sedimentation of the crosslinkers with actin  
43 filaments (methods) revealed that the K255E mutant has a nearly 10-fold higher affinity  
44 ( $15.55 \pm 0.04 \mu\text{M}^{-1}$ ) for actin than wild type  $\alpha$ -actinin-4 ( $1.95 \pm 0.04 \mu\text{M}^{-1}$ , Fig. 1e).  
45 Fluorescence recovery after photobleaching measurements of crosslinker dissociation  
46 confirmed that wild type  $\alpha$ -actinin-4 has a substantially higher off-rate than the mutant  
47 (Extended Data Fig. 2), consistent with prior measurements in cells<sup>26,27</sup>.

#### 48 **$\alpha$ -actinin-4 forms a weak catch bond while the K255E mutant forms a strong slip bond**

49 It has previously been speculated that force activates a cryptic actin-binding site of  $\alpha$ -actinin-  
50 4, based on the crystal structure<sup>28,29</sup>. It was furthermore proposed that the cryptic actin  
51 binding site is constitutively exposed by the K255E point mutation, increasing the binding  
52 affinity of  $\alpha$ -actinin-4 but also abrogating its catch bond behavior (Fig. 1a-b)<sup>13,14,26,28-30</sup>. To  
53 directly test this idea, we tethered single  $\alpha$ -actinin-4 molecules to polystyrene beads via DNA  
54 handles (2500 base pairs), and probed their binding to fluorescently tagged actin filaments,  
55 which fully coated another set of beads (Fig. 1c, see Methods). Using optical tweezers, we  
56 trapped an  $\alpha$ -actinin-4-coated bead and an actin-coated bead, as verified by simultaneous  
57 fluorescence imaging (Extended Data Fig. 3b) and performed bead approach-retraction  
58 cycles. When we detected a force increase upon retraction, which indicated a binding event,  
59 we subsequently maintained the tether at a pre-set force until the force suddenly dropped to  
60 zero and the beads separated (Fig. 1d), indicating forced crosslinker unbinding. The bond  
61 lifetime for the wild type  $\alpha$ -actinin-4 showed a load dependence consistent with catch bond  
62 behavior: short lifetimes at low loads, peaking at an intermediate load (around 4 pN), and  
63 decreasing for further increasing loads (Fig. 1f, red data). By contrast, the K255E point  
64 mutant showed slip bond behavior, with a lifetime higher than the wild type variant at low  
65 loads (consistent with the biochemical data) and monotonically decreasing for increasing  
66 tensions (Fig. 1f, blue data). The single-molecule data provide direct proof of earlier  
67 speculations that  $\alpha$ -actinin-4 forms weak catch bonds whilst the K255E point mutant forms  
68 strong slip bonds<sup>13,14,26,28-30</sup>.

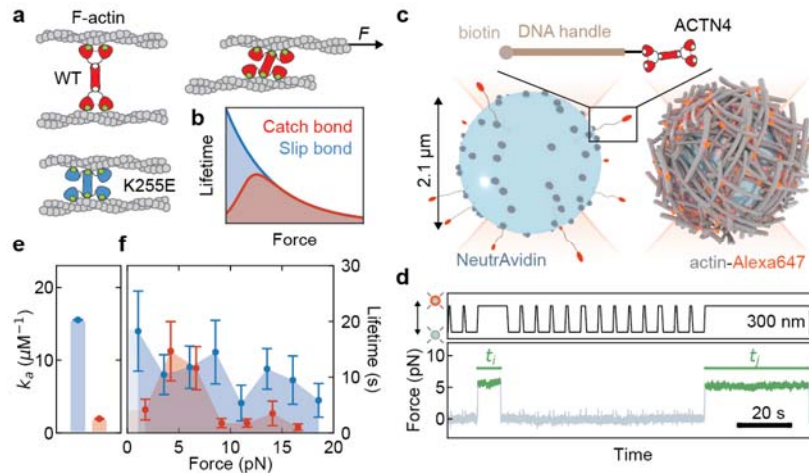

69

70 **Fig. 1: Single-molecule measurements of actin filament binding reveal catch bonding for wild type  $\alpha$ -**  
 71 **actinin-4 but not the K255E mutant.** **a**, Each monomer of the dimeric crosslinker  $\alpha$ -actinin-4 (red) has two weak  
 72 binding sites for actin filaments (green) and one strong binding site (white) that needs to be activated by force for  
 73 the wild type (WT) protein (red) whereas it is always exposed for the K255E mutant (blue). **b**, Conceptually, the  
 74 actin-bound lifetime of  $\alpha$ -actinin-4 should be lower than that of K255E at low force, but the lifetimes should  
 75 become comparable as force increases. **c**, Single-molecule force spectroscopy assay, where a crosslinker-coated  
 76 and an actin-coated bead are trapped using optical tweezers. **d**, Example trace illustrating the approach-and-  
 77 retract protocol to establish bonds between the crosslinkers and actin filaments (top panel). An increase in the  
 78 force while retracting indicates the presence of a tether (green), and the lifetime is measured until the instant the  
 79 tether breaks ( $t_i$ ,  $t_f$ , bottom panel). **e**, Actin association affinity  $k_a$  of  $\alpha$ -actinin-4 (red) and K255E (blue) measured in  
 80 a co-sedimentation assay. Error bars indicate standard error extracted from a fit assuming Michaelis-Menten  
 81 kinetics (Extended Data Fig. 1a-c). **f**, Average lifetime of tethers as a function of applied force, as measured by  
 82 optical tweezers (see panel d). The lifetime of wild type  $\alpha$ -actinin-4 (red) initially rises, peaks at a force of  $\sim 4$  pN,  
 83 and then decreases, as expected for a catch bond. The K255E mutant shows an overall decreasing lifetime,  
 84 typical of a slip bond. Error bars indicate standard error. Affinity and force spectroscopy data were obtained at 25  
 85  $^{\circ}\text{C}$ .

## 86 **Catch bonds increase actin network strength**

87 The observation that catch bonds are weaker than slip bonds raises the question whether  
 88 they also form weaker networks. To test the strength of crosslinked actin networks, we co-  
 89 polymerized actin with either crosslinker between the cone and plate of a rheometer and  
 90 linearly increased the mechanical load (shear stress) in time by rotating the cone until the  
 91 network ruptured (Fig. 2b, open circles). We simultaneously recorded the applied load  
 92 (stress) and resulting network deformation (strain) by superposing a small oscillatory shear  
 93 on top of the stress ramp to measure the differential elastic modulus. We first dissect the  
 94 effect of bond affinity on network rupturing by measuring networks crosslinked by the mutant  
 95 slip bonds at either high or low temperature (resp. 25  $^{\circ}\text{C}$  for low affinity and 10  $^{\circ}\text{C}$  for high  
 96 affinity). Consistent with intuition, we find that weaker linkers yield weaker networks (rupture  
 97 stresses of  $6.5 \pm 0.5$  Pa and  $8.1 \pm 1.1$  Pa at 25  $^{\circ}\text{C}$  and 10  $^{\circ}\text{C}$ , respectively, Fig. 2b, blue vs.

98 black bars). At the same time, the weaker networks are more deformable, meaning that they  
 99 reach a much larger strain before rupturing ( $63 \pm 4\%$  and  $129 \pm 10\%$ , resp. Fig. 2b, blue vs.  
 100 black bars). So how about the catch bonds, which have a lower affinity than the mutant slip  
 101 bonds but exhibit a different load dependence? Strikingly, networks crosslinked by the  $\alpha$ -  
 102 actinin-4 catch bonds at  $10^\circ\text{C}$  were more deformable than either of the slip bond networks  
 103 (rupture strain of  $221 \pm 16\%$ , Fig. 2b, red bars) yet also stronger (rupture stress of  $24.5 \pm 2.7$   
 104 Pa).

105 How can catch bonds escape the trade-off between strength and deformability that is  
 106 inherent in normal (slip) bonds? To answer this question, we developed a minimal model  
 107 where the crosslinked actin network was represented by an array of  $N$  reversible bonds  
 108 sharing a load  $\sigma$  (Fig. 2c, see Methods). We assumed nearest-neighbor load sharing  
 109 (Methods Eq. (2)), which provides a simple yet accurate way to model crack initiation in  
 110 viscoelastic materials, which is the rate-limiting step of rupturing (Extended Data Fig. 5)<sup>31,32</sup>.  
 111 We used idealized Bell-Evans force-dependent unbinding kinetics (Methods Eq. (1))<sup>33</sup>, and  
 112 allowed for unbound linkers to rebind at a random new location<sup>32,34</sup>. We chose our  
 113 parameters in accordance to the force spectroscopy and biochemical data, such that the  
 114 catch bonds are weaker at low force (Fig. 1b, see Extended Data Table 1 for all parameters).  
 115 Strikingly, the simulations also showed that weak catch bonds collectively make networks  
 116 that are stronger than slip bond networks (rupturing at nearly twice the stress, Fig. 2d), yet  
 117 more deformable (with 10-fold more bond turnovers before rupturing, Fig. 2d). This difference  
 118 persisted when including partially bound crosslinkers to account for the fact that  $\alpha$ -actinin is a  
 119 homodimer (Extended Data Fig. 6d, Supporting Information). The model also confirmed the  
 120 experimental observation that simply decreasing the bond lifetime while retaining a slip bond  
 121 response results in weaker networks (Fig. 2b).

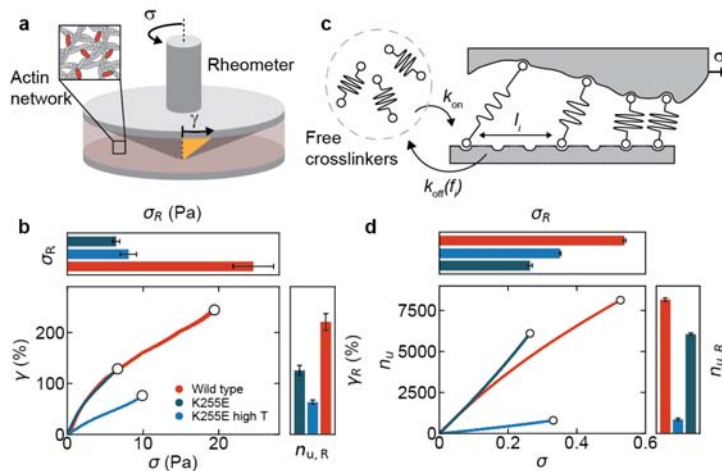

122

123 **Fig. 2: Catch bonds simultaneously enhance the mechanical strength and the deformability of**  
124 **cytoskeletal actin networks. a,** Scheme of rheology experiments to characterize actin network mechanics. We  
125 measure the shear deformation  $\gamma$  of actin networks crosslinked either with  $\alpha$ -actinin-4 or with K255E by linearly  
126 increasing the shear stress  $\sigma$  in time with a stress rate of 2.0 mPa/s. **b,** Representative examples of the shear  
127 strain  $\gamma$  as function of the shear stress  $\sigma$  for  $\alpha$ -actinin-4 (red), K255E (blue), both at 10 °C, and for K255E at an  
128 elevated temperature (25 °C, dark blue) where its lifetime matches that of wild type  $\alpha$ -actinin-4 at 10 °C (Extended  
129 Data Fig. 4c). The white circles indicate the rupture points (see Methods). The top panel shows the average  
130 rupture stress and the right panel the average rupture strain for each condition, with error bars representing the  
131 standard error ( $N=4$  for each condition). **c,** Actin networks are modelled as 1D arrays of reversible linkers that  
132 stochastically exchange between a bound and freely diffusing state. The applied load ( $\sigma$ ) linearly increases in time  
133 and is shared over all bound linkers proportionally to the distance to the nearest neighbors  $l_i$ . **d,** The total number  
134 of unbinding events per bond  $n_u$  as a function of applied stress (see Methods), showing the same crosslinker  
135 dependence as the rheology experiments. The error bars in the top and right panel show the standard error  
136 ( $N=100$  for each condition).

### 137 **Mechanism of catch bond-induced network strengthening**

138 To identify the mechanism behind the remarkable mechanical advantage of catch bonds, we  
139 quantified the steady state distributions of the load per individual crosslinker (Fig. 3a). At a  
140 given macroscopic load, the average force per bond was higher for the catch bonds  
141 compared to the slip bonds (resp.  $0.241 \pm 0.003$  and  $0.223 \pm 0.001$ , mean  $\pm$  standard error),  
142 consistent with their lower bond affinity. Strikingly, however, the distribution of forces for  
143 catch bonds was much narrower than for the slip bonds, meaning that slip bond networks  
144 contain more bonds that bear high loads. We next tested the size at which gaps initiate  
145 cracks in networks of mobile linkers, by ablating adjacent bonds and simulating the network  
146 stability as a function of the gap size. Notably, gaps twice as large were required to rupture  
147 networks of catch bonds compared to slip bonds (Fig. 3b). These findings suggest that catch  
148 bonds 'dissociate-on-demand' from low-stress areas, freeing up crosslinkers that rebind in  
149 high-stress areas and hence prevent the initiation of cracks. Simulations showed that the  
150 mechanical advantage of catch bonds over slip bonds was indeed lost when the catch bonds  
151 are immobile (Extended Data Fig. 6c).

152 As crosslinker rebinding is important for the mechanism, we next investigate how the  
153 mechanical advantage of catch bonding depends on the binding rate. We find that in case of  
154 low binding rates, slip bonds provide stronger networks than catch bonds (Extended Data  
155 Fig. 7a): in this regime, catch bond-induced dissociation strongly decreases the bound  
156 fraction, thereby weakening the network. By contrast, when the binding rate is high,  
157 increased dissociation barely affects the bound fraction as crosslinkers rapidly rebind.  
158 Therefore, catch bonds provide stronger networks only when the binding affinity is high  
159 (binding faster than unbinding, Extended Data Fig. 7a), which is the relevant situation for real  
160 actin networks crosslinked by  $\alpha$ -actinin-4 (Extended Data Fig. 1d) and also appears to be the

161 relevant regime in cells given the strong co-localization of  $\alpha$ -actinin-4 with the actin  
162 cytoskeleton<sup>13,26</sup>. To experimentally test these predictions, we performed rupturing  
163 experiments on actin networks where we increased the bond affinity by decreasing the  
164 temperature from 25 °C to 10 °C (Extended Data Fig. 4a-c)<sup>34</sup>. Consistent with the model's  
165 prediction, the rupture stress indeed increased more steeply for the  $\alpha$ -actinin-4 catch bonds  
166 than for the K255E slip bonds (Extended Data Fig. 7b).

167 Our model predicts that catch bonding triggered by network stress is key to explain the  
168 increased strength of the wild  $\alpha$ -actinin-4 crosslinkers. To test whether the loads exerted on  
169 the network were indeed sufficient to activate the catch bonds, we determined the crosslinker  
170 unbinding time from the network mechanics at different levels of shear stress, using a small  
171 oscillatory stress at different frequencies to measure the viscoelastic response time  
172 (Supplementary Information, Methods). This assay provides the characteristic network  
173 relaxation time, which is directly proportional to the crosslinker unbinding time<sup>35</sup>. The network  
174 relaxation time in case of wild type  $\alpha$ -actinin-4 crosslinkers increased with increasing shear  
175 stress, consistent with catch bonding. For the K255E crosslinkers, the stress relaxation time  
176 was larger than for the catch bonds at low shear stress but similar at high stress (Extended  
177 Data Fig. 4e-h), mirroring the behavior observed at the single molecule level. These findings  
178 show that macroscopically applied stresses above 5 Pa indeed activate strong binding for  
179 wild type  $\alpha$ -actinin-4, whereas the K255E mutant behaves like a conventional slip bond,  
180 being strongest at small loads.

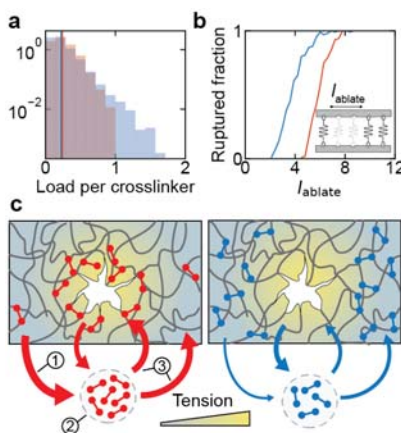

181

182 **Fig. 3: Simulations reveal that catch bonds strengthen networks by suppressing force inhomogeneities.**

183 **a**, The distribution of forces per bond  $f$  measured at steady state. The average bond force (vertical lines,  $0.241 \pm$   
184  $0.003$  and  $0.223 \pm 0.001$ , mean  $\pm$  standard error) is larger for catch bonds (red) than for slip bonds (blue), but the  
185 force distribution is much narrower. **b**, The fraction of networks that rupture when a gap of varying ablation length  
186  $l_{ablate}$  is introduced for both catch (red) and slip bonds (blue). Inset: schematic of the ablation simulation. **c**, Self-  
187 assembly mechanism explaining the mechanical advantage of weak catch bonds (red, left) over strong slip bonds  
188 (blue, right). The thickness of the colored arrows codes for the on- and off-rate of the linkers. 1. Catch bond

189 linkers in low tension areas rapidly unbind, increasing the pool of unbound linkers (2). As a result, there is  
190 increased binding everywhere in the network (3), at the expense of only the linkers in low tension areas. The net  
191 result is that the force distribution homogenizes, preventing crack initiation. By contrast, slip bonds preferentially  
192 localize in low-stress areas.

193

## 194 **Discussion**

195 Our work reveals a new role for catch bonds in the cytoskeleton, namely to simultaneously  
196 increase its mechanical strength and its deformability. Contrary to the common intuition that  
197 catch bonds provide strength-on-demand, our model shows that they make strong networks  
198 because dissociation-on-demand enables them to suppress force inhomogeneities and thus  
199 postpone crack initiation. Our findings provide a molecular mechanism to explain the low  
200 mechanical stability of kidney cells in patients afflicted by heritable disease kidney focal  
201 segmental glomerulosclerosis type 1, where  $\alpha$ -actinin-4 carries the point mutation K255E<sup>22,25</sup>,  
202 and suggest a similar explanation for other diseases where loss of catch bonding leads to  
203 tissue failure, such as Von Willebrand disease 2B<sup>11,12</sup>. The generality of our model implies  
204 that this same mechanism also applies to catch bonds in cell-matrix and cell-cell  
205 adhesions<sup>1,2,16-20</sup>, as dissociation-on-demand reduces friction whilst simultaneously  
206 minimizing the risk of complete cell detachment. Therefore, our results suggest that catch  
207 bonds are widespread in the cytoskeleton and at cellular interfaces to break this  
208 deformability/strength trade-off, and it would be interesting to investigate force-dependent  
209 binding of more crosslinkers and adhesins, such as filamin and IgSF CAMs. Finally, our  
210 findings offer a cell-inspired route to create hydrogel materials that are strong yet sufficiently  
211 deformable for applications in regenerative medicine<sup>36</sup>. Compared to existing strategies such  
212 as hierarchic structuring<sup>24,37</sup>, catch bonding is a simpler and more modular approach to  
213 improve material strength, as it only affects a single length scale, namely the molecular  
214 structure of the linker. Synthetic analogues of catch bonds have recently been discovered  
215 and provide an excellent starting point towards highly dynamic yet strong biomimetic  
216 materials<sup>38</sup>.

217

## METHODS

### 218 Computational model

219 To investigate the effect of molecular catch bonding on the strength of cytoskeletal filament networks, we use a  
220 computational model we recently developed to predict failure of transient networks<sup>35</sup>, using a Gillespie algorithm  
221 to model stochastic linker binding and unbinding. We consider a 1D model of  $N$  linkers that share an externally  
222 applied load  $\sigma$  (Fig. 2c). We model the effect of a force  $f$  on the unbinding rate  $k_{\text{off}}$  of a bound linker  $i$  using the  
223 Bell-Evans equation<sup>39</sup>:

$$k_{\text{off},i}(f_i) = k_{\text{off},0}^{\text{catch}} \cdot e^{\frac{-f_i}{f_{1/e}^{\text{catch}}}} + k_{\text{off},0}^{\text{slip}} \cdot e^{\frac{f_i}{f_{1/e}^{\text{slip}}}} \quad (\text{Eq. 1})$$

224 The first exponent models the catching of the weakly bound state, whereas the second exponent models the  
225 slipping of the force-activated state. We compare catch bonds with slip bonds, which do not require force-  
226 activation for strong binding ( $k_{\text{off},0}^{\text{catch}} = 0$ ), keeping all other parameters identical (Fig. 1b, see Extended Data Table  
227 1 for the full list of parameters used for each simulation). We define the bond affinity as  $K = \frac{k_{\text{on}}}{k_{\text{on}} + k_{\text{off},0}}$ , where  $k_{\text{on}}$  is  
228 the on-rate of unbound linkers. To account for the mobility by random diffusion of the linkers after unbinding, we  
229 allow for unbound linkers to rebind at a random new location<sup>39</sup>. As the actin concentration is significantly larger  
230 than the crosslinker concentration both in our reconstituted networks (resp. 48  $\mu\text{M}$  and 0.48  $\mu\text{M}$ ) and in living cells  
231 (on the order of resp. 100  $\mu\text{M}$  and 1  $\mu\text{M}$ <sup>40</sup>), we consider 10-fold more binding sites than crosslinkers to prevent  
232 competition for actin-binding sites. For control simulations where the linkers are immobile (Extended Data Fig.  
233 6c), we only allow for rebinding in the same place where the crosslinker unbound<sup>41</sup>.

234 It is known that stressed networks connected by reversible bonds exhibit spontaneous crack initiation and  
235 propagation due to inhomogeneous load sharing<sup>42</sup>. We reproduce this rupturing behavior using a minimal model  
236 where the force per linker  $f_i$  is proportional to the global applied stress and the distance between its nearest  
237 neighbors on both sides  $l_i$  in 1D (Fig. 2c):

$$f_i = \frac{l_i}{\sum_i l_i} \cdot \sigma \cdot N \quad (\text{Eq. 2})$$

238 We use a periodic boundary condition to prevent edge effects. We initialize networks by randomly placing  $N \cdot K$   
239 linkers (see Extended Data Table 1 for all parameters). The Supplementary Information and Extended Data Fig.  
240 6a-b contain a more detailed discussion of the effect of network size.

241 We use bond turnover as a proxy for deformability. Although the exact, quantitative relationship is complex and  
242 beyond the scope of this work, bond turnover is proportional to actin network deformability<sup>35</sup>. Indeed, actin  
243 networks without bond turnover rupture at only approximately 10% shear strain<sup>43</sup>, whereas the transiently  
244 crosslinked networks here reach maximal strains of up to several hundred percent, showing that bond turnover  
245 dominates network deformability.

### 246 Protein purification

247 Human wild type  $\alpha$ -actinin-4 and its K255E point mutant were purified as previously described<sup>44</sup>. Briefly, *E. Coli*  
248 cells were transformed to express recombinant crosslinkers with a His<sub>6</sub>-tag. Induction was performed with 500  $\mu\text{M}$   
249 isopropyl  $\beta$ -D-1-thiogalactopyranoside for eight hours at 25 °C. After centrifugation at 6000 g for 15 minutes, cells  
250 were resuspended in 20 mM NaCl, 5 mg/ml lysozyme and 20 mM HEPES, pH 7.8. The cells were lysed by a  
251 freeze-thaw cycle and the lysate was centrifuged at 20,000 g for 30 min. The recombinant proteins were purified



252 from the supernatant using a QIAGEN nickel column that was first washed with 20 bed volumes of 500 mM NaCl,  
253 25 mM imidazole, and 20 mM HEPES, pH 7.8. The recombinant proteins were eluted with 10 bed volumes of 500  
254 mM NaCl, 500 mM imidazole, and 20 mM HEPES, pH 7.8, concentrated using Centricon filters (Millipore), and  
255 purified by gel filtration in 150 mM NaCl, 20 mM HEPES pH 7.8, and 10 mM dithiothreitol (DTT). Actin was  
256 labeled using an Alexa Fluor Labeling Kit purchased from ThermoFisher and biotin-actin was purchased from  
257 Cytoskeleton.

258 To ensure we compare  $\alpha$ -actinin-4 and K255E at the same concentration in all our assays, we determined the  
259 ratio of the protein stock concentrations by measuring the intensity of the protein bands on an SDS-PAGE gel. We  
260 chose this method because, unlike UV-VIS spectrophotometry, it specifically measures the protein of interest and  
261 excludes the contribution of any contaminants. The proteins were cysteine-labeled using maleimide-activated  
262 Oregon Green at a ratio of five fluorophores for every crosslinker at room temperature for 1 h. Labeled proteins  
263 were separated from free dye molecules by gel filtration using a Superdex 200 column (GE Healthcare)<sup>44</sup>.

264 Actin was purified from rabbit psoas skeletal muscle as described in reference<sup>45</sup>, including a gel filtration step to  
265 remove oligomers<sup>34</sup>. The concentration was determined by measuring the optical absorbance at 280 nm. Aliquots  
266 were snap-frozen and stored at -80 °C in G-buffer (2 mM tris-hydrochloride pH 8.0, 0.2 mM disodium adenosine  
267 triphosphate, 0.2 mM calcium chloride, 0.2 mM dithiothreitol) to prevent polymerization. After thawing, we stored  
268 G-actin stock samples overnight at 4 °C. The next day, we spun the sample at 120 000 g to remove any remaining  
269 aggregates. The supernatants were stored at 4 °C and used within 7 days. We polymerized actin at a  
270 concentration of 48  $\mu$ M (2 mg/ml) in an F-buffer consisting of 50 mM KCl, 20 mM imidazole pH 7.4, 2 mM MgCl<sub>2</sub>,  
271 1 mM DTT and 0.5 mM MgATP in the presence of crosslinker at a concentration of 0.48  $\mu$ M (corresponding to a  
272 molar ratio of 1/100 crosslinker/actin and on average around 1 crosslinker for every 0.5  $\mu$ m length of actin  
273 filament). We verified that the networks under these conditions are isotropic and spatially uniform by confocal  
274 fluorescence imaging (Extended Data Fig. 8). Unless otherwise mentioned, all chemicals were purchased at  
275 Sigma Aldrich.

#### 276 **SDS-PAGE gel protocol and quantification**

277 SDS-PAGE gels were used to characterize and quantify purified proteins. In all cases, 20  $\mu$ l sample was mixed  
278 with 20  $\mu$ l InstantBlue and boiled at 95 °C for 5 minutes in a closed Eppendorf vial. 30  $\mu$ l of this solution was  
279 loaded onto a 4–15% Mini-PROTEAN TGX Precast Protein Gel with 10 wells of 30  $\mu$ l. Gels were run for 30  
280 minutes at 200 V, washed with Milli-Q water, stained overnight with InstantBlue and washed three times with tap  
281 water. Band intensities were quantified using ImageJ<sup>46</sup>. Background correction was applied to all band intensities  
282 by subtracting the average intensity of a region adjacent to the band of interest.

#### 283 **Fluorescence Recovery After Photobleaching**

284 The bond lifetime of bound crosslinkers was measured via Fluorescence Recovery After Photobleaching (FRAP)  
285 using a Nikon A1 confocal microscope with a perfect focus system, 100x 1.40 NA oil immersion objective and  
286 100-mW 488 nm argon ion laser. We acquired 10 images to determine baseline fluorescence and then performed  
287 photobleaching by increasing the laser power such that 50-70% of the fluorescence intensity was bleached in 0.5  
288 seconds. We then tracked the fluorescence recovery with a low-intensity beam during a period of approximately 5  
289 times the typical recovery time, with a sampling rate that halved every 10 frames, starting with 10 frames/second.  
290 During imaging, the exposure time was kept fixed at 0.1 second/frame. We bleached a circular area of 2  $\mu$ m  
291 radius and used an equally sized area as a reference. The laser intensity during imaging was chosen such that  
292 the reference intensity dropped less than 5% during the recovery phase. To extract a timescale for fluorescence

293 recovery,  $T_{\text{FRAP}}$ , the time-dependent intensity normalized by the intensity of the reference area was fitted with a  
294 single exponential function:  $I(t)/I_{\text{ref}} = 1 - I/I_0 \cdot e^{-t/\tau_{\text{FRAP}}}$ , where  $I_0$  is the intensity directly after bleaching<sup>34</sup>.

### 295 Co-sedimentation assay

296 A volume of 25  $\mu\text{l}$  monomeric (G-)actin at increasing concentrations was co-polymerized with either  $\alpha$ -actinin-4 or  
297 K255E in F-buffer at room temperature, keeping the crosslinker concentration constant (0.1  $\mu\text{M}$ ). After two hours  
298 of polymerization, the actin network together with the bound crosslinkers was spun down at 120 000 g.  
299 Afterwards, 20  $\mu\text{l}$  was gently pipetted from the supernatant and run on an SDS-PAGE gel as described above.  
300 The fraction of bound linkers  $\varphi_{\text{bound}}$  was determined by subtracting and normalizing the crosslinker band intensity  $I$   
301 at a particular actin concentration by the band intensity  $I_0$  in the absence of actin using ImageJ:  $\varphi_{\text{bound}} = \frac{I-I_0}{I_0}$ .

### 302 Rheology

303 Rheology was performed using a stress-controlled Kinexus Malvern Pro rheometer with a stainless-steel cone-  
304 plate geometry having a radius of 20 mm and a 1 degree cone angle. We loaded 40  $\mu\text{l}$  samples of actin  
305 monomers, directly after mixing with either  $\alpha$ -actinin-4 or K255E and F-buffer, onto the bottom plate and quickly  
306 lowered the cone. A thin layer of Fluka mineral oil Type A was added around the edge to prevent solvent  
307 evaporation, and the sample was closed off with a hood to prevent any effects of air flow. Actin polymerization  
308 was followed by applying a small oscillatory shear with a strain amplitude of 0.5% and a frequency of 0.5 Hz. After  
309 2 h of polymerization, the elastic shear modulus  $G'$  and viscous shear modulus  $G''$  were measured as a function  
310 of frequency by performing small amplitude oscillatory shear measurements at frequencies between 0.01-10 Hz,  
311 taking 30 logarithmically spaced data points. Frequencies above 10 Hz could not be accessed as inertial effects  
312 from the rheometer started to dominate the rheological response of the actin network. Finally, we performed a  
313 rupture experiment by linearly increasing the stress in time at a constant loading rate (2 mPa/s) until the network  
314 ruptured. The rate of 2 mPa/s was chosen because it was sufficiently slow to reliably measure the differential  
315 storage modulus at every stress level, whilst it was sufficiently fast to prevent network aging effects during the  
316 stress ramp. To unambiguously identify the rupture point, we measured the differential elastic modulus of the  
317 network as a function of stress by superposing small stress oscillations on top of the stress ramp. We observed  
318 stress-stiffening above a certain threshold stress, consistent with prior literature<sup>35</sup>, followed by a rapid drop of the  
319 stiffness that signals rupture. We defined the rupture point as the stress value at which the differential storage  
320 modulus  $K'$  peaked (Extended Data Fig. 4d). This approach allowed us to simultaneously identify the rupture  
321 stress and rupture strain (Fig 2c).

322 We determined the stress-dependent bound lifetime of the crosslinkers from the network mechanics, by applying  
323 a recently developed biopolymer network model<sup>35</sup> to the time- and stress-dependent network elasticity (differential  
324 storage modulus). Briefly, we superposed an oscillatory stress on top of a constant mechanical load – measuring  
325 the differential storage modulus  $K'$  over a wide range of frequencies ( $0.01 < \omega < 10$  Hz) and stresses ( $0.1 < \sigma < 8$   
326 Pa). We next fitted the differential storage modulus fitted  $K'(\sigma, \omega)$  to the following equation:

$$K' \sim \frac{\left(1 + (\sigma + \sigma_{0,\text{tr}})\right)^2}{1 + \sqrt{\omega_{\text{off}} + \omega}} \quad (\text{Eq. 3})$$

327 where  $\omega_{\text{off}}$  is the crosslinker unbinding frequency and  $\sigma_{0,\text{tr}}$  is the critical stress for stress-stiffening in the fast limit  
328 where crosslinkers have not had time to unbind.

329

### 330 **Generation of single-molecule constructs**

331 Both wild-type  $\alpha$ -actinin-4 and the K255E mutant were modified to include a ybbR tag (DSLEFIASKLA)<sup>39</sup> right  
332 after the His<sub>6</sub>-tag. Purified proteins were coupled to Coenzyme A-modified DNA oligonucleotides 20 nucleotides  
333 long using a phosphopantetheinyl transferase (SFP synthase)-mediated reaction<sup>39</sup>. A protein-to-DNA molar ratio  
334 of 10:1 ensured that only one monomer was coupled to DNA, as evidenced by SDS-PAGE analysis (Extended  
335 Data Fig. 3a). Next, 2.5 kilo base pair DNA tethers were PCR-amplified from the pUC19 plasmid (New England  
336 Biolabs) with a 5'-biotinylated primer on one side and a 5'-phosphoprimers on the other side. Purification was done  
337 with the QIAquick PCR purification kit (Qiagen, Hilden, Germany). The phosphorylated strand was digested using  
338  $\lambda$ -exonuclease (New England Biolabs) for 2 hours at 37°C and purified using an Amicon 30 kDa MWCO filter  
339 (Merck, Darmstadt, Germany). Deep Vent exo-DNA polymerase (New England Biolabs) and a 20-nucleotides  
340 more upstream primer than the phosphoprimers from the PCR was used to fill up the second DNA strand, creating  
341 a 20-nucleotide overhang<sup>41</sup>. This overhang is complementary to the 20-oligonucleotide sequence coupled to the  
342 proteins. The generated DNA tether was then ligated to the DNA-protein hybrid by overnight incubation with T4  
343 ligase (New England Biolabs) at room temperature. The stock sample was flash frozen and stored at -80 °C, and  
344 small aliquots were stored at 4 °C for maximally one week.

### 345 **Preparation of actin-coated and crosslinker-coated beads**

346 Unlabeled actin monomers were mixed with biotinylated monomers and fluorescent monomers labeled with Alexa  
347 Fluor 647 in a molar ratio of 8:1:1 and polymerized into filaments in 1 mL F-buffer at a concentration of 2  $\mu$ M for 2  
348 hours. Next, these filaments were mixed with 4  $\mu$ l of 2.4  $\mu$ M Neutravidin-coated beads (NVP-20-5, diameter 2.1  
349  $\mu$ m, Spherotech) and incubated for 15 minutes to couple the filaments to the beads. The actin-coated beads were  
350 separated from unbound actin filaments by centrifuging 3x at 1000 rcf for 2 minutes. After every round, 800  $\mu$ l of  
351 supernatant was discarded, whilst carefully avoiding disturbing the pellet, and replaced by 800  $\mu$ l of fresh F-buffer.  
352 Successful coating was verified using confocal fluorescence microscopy by the presence of a fluorescent ring on  
353 the edge of the bead upon excitation with a 638 nm laser (Extended Data Fig. 3b). For the other bead type,  
354 approximately 50 ng of the generated crosslinker-DNA construct was incubated with 2  $\mu$ l NeutrAvidin beads in 10  
355  $\mu$ l F-buffer for 15 min in a rotary mixer at 4 °C, and then rediluted in 500  $\mu$ l F-buffer with 100 mM biotin excess to  
356 block unbound NeutrAvidin. Unbound biotin was removed during the optical tweezer assay by flushing F-buffer  
357 after trapping the beads.

### 358 **Single molecule data acquisition and analysis**

359 Force spectroscopy data was collected at 500 Hz using a custom-built dual trap optical tweezers and a  
360 commercial C-Trap (Lumicks). Data was analyzed using custom scripts in Python. The optical traps were  
361 calibrated using the power spectrum of the Brownian motion of the trapped beads<sup>47</sup>, obtaining average stiffness  
362 values of  $\kappa = 0.39 \pm 0.04$  pN nm<sup>-1</sup>. After trapping beads with the two different coatings (Extended Data Fig. 3b),  $\alpha$ -  
363 actinin-4-actin binding was established by approaching and maintaining both beads in close proximity during  
364 approximately 10 seconds. Tether lifetime was assessed by rapidly retracting the beads to a set distance – thus  
365 increasing the applied force – and measuring the time until the tether broke. To discriminate single from multiple  
366 connections, we used the worm-like-chain (WLC) model and the fact that single double-stranded DNA exhibits an  
367 overstretching plateau in the force-extension curve at forces above 65 pN (Extended Data Fig. 3c). We pulled on  
368 tethers to high forces and observed that the contour length (computed using the WLC) of those that displayed  
369 overstretching characteristic of single tethers matched the expected value of 850 nm within a  $\sim$ 60 nm range, likely  
370 due to the variability in the bead radii and the thickness of the actin coat. Multiple tethers, in contrast to single  
371 ones, did not show this characteristic overstretching, and their apparent length was most often shorter (Extended  
372 Data Fig. 3c). Therefore, we considered tethers that displayed the expected contour length of  $850 \pm 30$  nm and

373 broke in a clean step. Most tethers showed dissociation below a minute waiting time (55% of tethers, across all  
374 forces). Tethers that lasted longer generally did not break at all, even after several minutes under tension. Hence,  
375 lifetimes were determined from tethers showing dissociation within one minute. Lifetime statistical comparisons  
376 were obtained by a one-sided t-test.

377

## 378 References

- 379 1. Marshall, B. T. *et al.* Direct observation of catch bonds involving cell-adhesion  
380 molecules. *Nature* **423**, 190–3 (2003).
- 381 2. Liu, B., Chen, W., Evavold, B. D. & Zhu, C. Accumulation of Dynamic Catch Bonds  
382 between TCR and Agonist Peptide-MHC Triggers T Cell Signaling. *Cell* **157**, 357–368  
383 (2014).
- 384 3. Doss, B. L. *et al.* Cell response to substrate rigidity is regulated by active and passive  
385 cytoskeletal stress. *Proceedings of the National Academy of Sciences* 201917555 (2020)  
386 doi:10.1073/pnas.1917555117.
- 387 4. Thomas, W. E., Trintchina, E., Forero, M., Vogel, V. & Sokurenko, E. v. Bacterial  
388 Adhesion to Target Cells Enhanced by Shear Force. *Cell* **109**, 913–923 (2002).
- 389 5. Huang, D. L., Bax, N. A., Buckley, C. D., Weis, W. I. & Dunn, A. R. Vinculin forms a  
390 directionally asymmetric catch bond with F-actin. *Science* **357**, 1–5 (2017).
- 391 6. Akiyoshi, B. *et al.* Tension directly stabilizes reconstituted kinetochore-microtubule  
392 attachments. *Nature* **468**, 576–579 (2010).
- 393 7. Yamada, A. *et al.* Catch-bond behaviour facilitates membrane tubulation by non-  
394 processive myosin 1b. *Nature Communications* **5**, 3624 (2014).
- 395 8. Laakso, J. M., Lewis, J. H., Shuman, H. E. & Ostap, M. E. Myosin I Can Act As a Molecular  
396 Force Sensor. *Science* **321**, 133–137 (2008).
- 397 9. Mbanga, B. L., Iyer, B. V. S., Yashin, V. v. & Balazs, A. C. Tuning the Mechanical  
398 Properties of Polymer-Grafted Nanoparticle Networks through the Use of Biomimetic  
399 Catch Bonds. *Macromolecules* **49**, 1353–1361 (2016).
- 400 10. Lee, C. -y. *et al.* Actin depolymerization under force is governed by lysine 113:glutamic  
401 acid 195-mediated catch-slip bonds. *Proceedings of the National Academy of Sciences*  
402 **110**, 5022–5027 (2013).
- 403 11. Yago, T. *et al.* Platelet glycoprotein Iba forms catch bonds with human WT vWF but  
404 not with type 2B von Willebrand disease vWF. *Journal of Clinical Investigation* **118**,  
405 3195–3207 (2008).
- 406 12. Kim, J., Zhang, C.-Z., Zhang, X. & Springer, T. A. A mechanically stabilized receptor-  
407 ligand flex-bond important in the vasculature. *Nature* **466**, 992–995 (2010).
- 408 13. Luo, T., Mohan, K., Iglesias, P. a & Robinson, D. N. Molecular mechanisms of cellular  
409 mechanosensing. *Nature materials* **12**, 1064–71 (2013).
- 410 14. Schiffhauer, E. S. *et al.* Mechanoaccumulative Elements of the Mammalian Actin  
411 Cytoskeleton. *Current Biology* **26**, 1473–1479 (2016).

- 412 15. Buckley, C. D. *et al.* Cell adhesion. The minimal cadherin-catenin complex binds to  
413 actin filaments under force. *Science* **346**, 1254211 (2014).
- 414 16. Sokurenko, E. v., Vogel, V. & Thomas, W. E. Catch-Bond Mechanism of Force-Enhanced  
415 Adhesion: Counterintuitive, Elusive, but ... Widespread? *Cell Host and Microbe* **4**, 314–  
416 323 (2008).
- 417 17. Sauer, M. M. *et al.* Catch-bond mechanism of the bacterial adhesin FimH. *Nature*  
418 *Communications* **7**, 10738 (2016).
- 419 18. Mould, A. P. *et al.* Cyclic Mechanical Reinforcement of Integrin – Ligand Interactions.  
420 *Cell* 1060–1068 (2013) doi:10.1016/j.molcel.2013.01.015.
- 421 19. Friedland, J. C., Lee, M. H. & Boettiger, D. Mechanically Activated Integrin Switch  
422 Controls 5 1 Function. *Science* **323**, 642–644 (2009).
- 423 20. Luca, V. C. *et al.* Notch-Jagged complex structure implicates a catch bond in tuning  
424 ligand sensitivity. *Science* **355**, 1320–1324 (2017).
- 425 21. Burla, F., Mulla, Y., Vos, B. E., Aufderhorst-Roberts, A. & Koenderink, G. H. From  
426 mechanical resilience to active material properties in biopolymer networks. *Nature*  
427 *Reviews Physics* (2019) doi:10.1038/s42254-019-0036-4.
- 428 22. Kaplan, J. M. *et al.* Mutations in ACTN4, encoding  $\alpha$ -actinin-4, cause familial focal  
429 segmental glomerulosclerosis. *Nature Genetics* **24**, 251–256 (2000).
- 430 23. Feng, D. *et al.* Disease-causing mutation in  $\alpha$ -actinin-4 promotes podocyte detachment  
431 through maladaptation to periodic stretch. *Proceedings of the National Academy of*  
432 *Sciences* **115**, 1517–1522 (2018).
- 433 24. Wegst, U. G. K. *et al.* Bioinspired structural materials. *Nature materials* **14**, 23–36  
434 (2014).
- 435 25. Feng, D., DuMontier, C. & Pollak, M. R. Mechanical challenges and cytoskeletal  
436 impairments in focal segmental glomerulosclerosis. *American Journal of Physiology-*  
437 *Renal Physiology* **314**, F921–F925 (2018).
- 438 26. Ehrlicher, A. J. *et al.* Alpha-actinin binding kinetics modulate cellular dynamics and  
439 force generation. *Proceedings of the National Academy of Sciences* **112**, 201505652  
440 (2015).
- 441 27. Weins, A. *et al.* Disease-associated mutant alpha-actinin-4 reveals a mechanism for  
442 regulating its F-actin-binding affinity. *Proceedings of the National Academy of Sciences*  
443 *of the United States of America* **104**, 16080–5 (2007).
- 444 28. Galkin, V. E., Orlova, A., Salmazo, A., Djinic-Carugo, K. & Egelman, E. H. Opening of  
445 tandem calponin homology domains regulates their affinity for F-actin. *Nature*  
446 *Structural & Molecular Biology* **17**, 614–616 (2010).

- 447 29. Ribeiro, E. D. A. *et al.* The structure and regulation of human muscle  $\alpha$ -Actinin. *Cell*  
448 **159**, 1447–1460 (2014).
- 449 30. Yao, N. Y. *et al.* Stress-Enhanced Gelation: A Dynamic Nonlinearity of Elasticity.  
450 *Physical Review Letters* **110**, 018103 (2013).
- 451 31. Mulla, Y., Oliveri, G., Overvelde, J. T. B. & Koenderink, G. H. Crack Initiation in  
452 Viscoelastic Materials. *Physical Review Letters* **120**, 268002 (2018).
- 453 32. Mulla, Y. & Koenderink, G. H. Crosslinker mobility weakens transient polymer  
454 networks. *Physical Review E* **98**, 062503 (2018).
- 455 33. Bell, G. Models for the specific adhesion of cells to cells. *Science* **200**, 618–627 (1978).
- 456 34. Mulla, Y., Wierenga, H., Alkemade, C., ten Wolde, P. R. & Koenderink, G. H. Frustrated  
457 binding of biopolymer crosslinkers. *Soft Matter* 3036–3042 (2019)  
458 doi:10.1039/c8sm02429d.
- 459 35. Mulla, Y., Mackintosh, F. C. & Koenderink, G. H. Origin of Slow Stress Relaxation in the  
460 Cytoskeleton. *Physical Review Letters* **122**, 218102 (2019).
- 461 36. Rosales, A. M. & Anseth, K. S. The design of reversible hydrogels to capture  
462 extracellular matrix dynamics. *Nature Reviews Materials* **1**, 15012 (2016).
- 463 37. Yeom, B. *et al.* Abiotic tooth enamel. *Nature* **543**, 95–98 (2017).
- 464 38. Garcia-Manyes, S., Liang, J., Szoszkiewicz, R., Kuo, T.-L. & Fernández, J. M. Force-  
465 activated reactivity switch in a bimolecular chemical reaction. *Nature chemistry* **1**,  
466 236–242 (2009).
- 467 39. Yin, J. *et al.* Genetically encoded short peptide tag for versatile protein labeling by Sfp  
468 phosphopantetheinyl transferase. *Proceedings of the National Academy of Sciences*  
469 **102**, 15815–15820 (2005).
- 470 40. Pollard, T. D., Blanchoin, L. & Mullins, R. D. Molecular Mechanisms Controlling Actin  
471 Filament Dynamics in Nonmuscle Cells. *Annual Review of Biophysics and Biomolecular*  
472 *Structure* **29**, 545–576 (2000).
- 473 41. Avellaneda, M. J., Koers, E. J., Minde, D. P., Sunderlikova, V. & Tans, S. J. Simultaneous  
474 sensing and imaging of individual biomolecular complexes enabled by modular DNA–  
475 protein coupling. *Communications Chemistry* **3**, 20 (2020).
- 476 42. Smith, S. B., Cui, Y. & Bustamante, C. Overstretching B-DNA: The Elastic Response of  
477 Individual Double-Stranded and Single-Stranded DNA Molecules. *Science* **271**, 795–799  
478 (1996).
- 479 43. Gardel, M. L. *et al.* Elastic behavior of cross-linked and bundled actin networks. *Science*  
480 (*New York, N.Y.*) **304**, 1301–5 (2004).

- 481 44. Tang, V. W. & Brieher, W. M. alpha-Actinin-4/FSGS1 is required for Arp2/3-dependent  
482 actin assembly at the adherens junction. *Journal of Cell Biology* **196**, 115–130 (2012).
- 483 45. Mulla, Y., Wierenga, H., Alkemade, C., ten Wolde, P. R. & Koenderink, G. H. Frustrated  
484 binding of biopolymer crosslinkers. *Soft Matter* **15**, (2019).
- 485 46. Schneider, C. A., Rasband, W. S. & Eliceiri, K. W. NIH Image to ImageJ: 25 years of  
486 image analysis. *Nature Methods* **9**, 671–675 (2012).
- 487 47. Berg-Sørensen, K. & Flyvbjerg, H. Power spectrum analysis for optical tweezers.  
488 *Review of Scientific Instruments* **75**, 594–612 (2004).

489

490 **Author contributions:** Y.M. and G.H.K. conceived and designed the study. M.J.A. and  
491 S.J.T. designed the optical tweezer experiments. M.J.A., A.R. and L.B. performed the optical  
492 tweezer experiments. M.J.A. and A.R. analyzed the optical tweezer experiments. Y.M.  
493 performed and analyzed all other experiments and designed and simulated the theoretical  
494 model. Y.M., M.J.A, S.J.T. and G.H.K. wrote the manuscript with input from A.R. and L.B. All  
495 authors approved the final version.

496 **Acknowledgements:** We thank Martin van Hecke and Celine Alkemade for critical reading  
497 of the manuscript. We thank Taeyoon Kim, Pieter Rein ten Wolde, Kees Storm, Wouter  
498 Ellenbroek, Chase Broedersz, David Brueckner and Mareike Berger for fruitful discussions.  
499 We thank William Brieher and Vivian Tang for the kind gift of purified  $\alpha$ -actinin-4 (wild type  
500 and the K255E point mutant) and their plasmids, Marjolein Kuit-Vinkenoog for actin and  
501 further purification  $\alpha$ -actinin-4 and Vanda Sunderlíková for design, mutagenesis, cloning and  
502 purifying of the  $\alpha$ -actinin-4 constructs used in the single molecule experiments. This work is  
503 part of the research program of the Netherlands Organization for Scientific Research (NWO).  
504 We gratefully acknowledge financial support from an ERC Starting Grant (335672-  
505 MINICELL) awarded to G.K.

506 **Data availability:** The data that support the findings of this study are available from the  
507 corresponding authors upon reasonable request.

508 **Code availability:** Custom-written scripts used in this study are available from the  
509 corresponding authors upon reasonable request.

#### 510 **Additional information**

511 **Supplementary Information** is available for this paper.

512 **Correspondence and requests for materials** should be addressed to G.H.K and S.J.T.





## 514 **Supplementary Information**

### 515 **Weak catch bonds make strong networks**

516 Yuval Mulla<sup>1,2</sup>, Mario J Avellaneda<sup>1</sup>, Antoine Roland<sup>1</sup>, Lucia Baldauf<sup>1,3</sup>, Sander J Tans<sup>1,3\*</sup>, Gijsje H  
517 Koenderink<sup>1,3\*</sup>

518

519 <sup>1</sup> Living Matter Department, AMOLF, Amsterdam, The Netherlands

520 <sup>2</sup> Institute for Biological Physics, University of Cologne, Cologne, Germany

521 <sup>3</sup> Department of Bionanoscience, Kavli Institute of Nanoscience Delft, Delft University of Technology,  
522 Delft 2629HZ, the Netherlands

523 \*Correspondence to: [g.h.koenderink@tudelft.nl](mailto:g.h.koenderink@tudelft.nl), [tans@amolf.nl](mailto:tans@amolf.nl)

524

### 525 **Frequency-dependent rheology shows that crosslinking affects the dynamics, but not** 526 **the structure of actin networks**

527 To test for the influence of the binding affinity of the two  $\alpha$ -actinin-4 variants (wild type and  
528 K255E) on the dynamics of actin networks, we performed small-amplitude oscillatory shear  
529 measurements on the crosslinked actin networks over a range of oscillation frequencies ( $10^{-3}$   
530 to 10 Hz, see Extended Data Fig. 4a). For both variants, the frequency spectrum of the shear  
531 moduli has a functional form that is characteristic of transiently crosslinked semiflexible  
532 polymer networks<sup>1,2</sup>. For low frequencies, below the crosslinker unbinding frequency, both  
533 networks deform viscoelastically, with the storage modulus  $G'$  and loss modulus  $G''$  both  
534 following a power law dependence on frequency with an exponent of  $1/2$ . This exponent  
535 arises from the superposition of multiple relaxation times of many crosslinkers connecting a  
536 single filament to the surrounding network, which collectively cause a  $\omega^{-1/2}$  relaxation<sup>1</sup>. We  
537 observe a characteristic relaxation frequency where  $G''$  exhibits a peak and  $G'$  exhibits an  
538 elastic plateau. This relaxation frequency corresponds to the crosslinker unbinding rate<sup>1</sup>. At  
539 frequencies above 5 Hz, both moduli show a slight upturn, which reflects the influence of  
540 viscous drag on the actin filaments.

541 When we compare the frequency spectrum for actin networks crosslinked with the two  $\alpha$ -  
542 actinin-4 variants, we observe that replacing the wild type variant by the K255E mutant  
543 causes a shift of the relaxation frequency, indicating slower unbinding as expected from the  
544 higher binding affinity. When we normalize the applied frequency with the relaxation  
545 frequency, the  $G'$  and  $G''$  curves for the K255E mutant can be super-imposed on the wild

546 type  $\alpha$ -actinin-4 curves with only a small deviation at high normalized frequencies, which we  
547 attribute to the effect of the viscous drag on the filaments (Extended Data Fig. 4b).

548 We can tune the relaxation frequency for actin networks crosslinked with K255E by  
549 increasing the temperature<sup>3</sup> from 10 °C to 25 °C such that it equals the peak frequency of  
550 networks crosslinked with the wild type variant at low temperature (10 °C). Now, the time-  
551 dependent linear rheology of both networks is indistinguishable even without normalizing the  
552 frequency (Extended Data Fig. 4c). This collapse suggests that, although the crosslinker  
553 lifetime is longer for the wild type  $\alpha$ -actinin-4 than for the K255E mutant, the network  
554 structure is not significantly different. For example, any change in the typical crosslinker  
555 distance would have altered the shear modulus<sup>1</sup>. Indeed, with light microscopy we do not find  
556 any bundles, indicating that both networks are isotropically crosslinked (Extended Data Fig.  
557 8).

### 558 **Catch bonds still enhance network strength when taking into account their dimeric** 559 **molecular structure**

560 In the model presented in the main text, crosslinkers are either bound or unbound. However,  
561 the  $\alpha$ -actinin-4 crosslinkers in the experiments can also be partially bound (i.e., only to one  
562 actin filament), because they have two independent actin-binding domains separated by a  
563 spacer. To test whether allowing for partially bound crosslinkers qualitatively affects the  
564 model predictions, we expand the model to allow for three binding states, where doubly  
565 bound crosslinkers become singly bound crosslinkers with an unbinding rate of  $k_{2 \rightarrow 1}(f_i)$ ,  
566 following force-induced unbinding according to Eq. (1) of the Material and Methods. Singly  
567 bound crosslinkers become fully unbound with a rate of  $k_{1 \rightarrow 0}$ , or doubly bound with a rate of  
568  $k_{1 \rightarrow 2}$ . Force is only shared between neighboring doubly-bound crosslinkers. For simplicity,  
569 we have chosen  $k_{1 \rightarrow 0} = k_{2 \rightarrow 1}(0)$  and  $k_{0 \rightarrow 1} = k_{1 \rightarrow 2} = 1$ . Importantly, allowing for this  
570 additional, partially bound state does not qualitatively affect the predictions of the  
571 computational model, as catch bonds still form networks that are both stronger and more  
572 dynamic than networks formed with slip bonds (Extended Data Fig. 6d). For all other  
573 simulations, we therefore use a two-state model as it is the most minimal model that captures  
574 our experimental results.

### 575 **Catch bonds enhance the strength of materials that fracture via crack propagation**

576 Our experiments demonstrate that catch bonds collectively provide stronger networks, even  
577 though they are actually weaker on the single molecule level. This raises the question how  
578 many bonds are required for the catch bond advantage to emerge. To answer this question,  
579 we performed fracturing simulations at different network sizes (1-200 linkers, Extended Data  
580 Figure 7a,b). We find that for both catch and slip bond networks, the rupture strength and

581 bond turnover number initially increase with increasing bond number, peak when the bond  
582 number reaches around 10, and then continuously decrease with increasing bond number.  
583 Remarkably, slip bond networks are stronger for systems smaller than 10 bonds, while catch  
584 bond networks have both larger network strength and bond turnover for networks larger than  
585 10 bonds.

586 Why is catch bonding (only) superior in large networks? To understand this, we need the  
587 notion of a critical crack size from fracture mechanics<sup>4,5</sup>. When a large crack (a part of the  
588 network that is devoid of crosslinkers) is under stress, bonds at the edge of the crack rapidly  
589 unbind, causing crack propagation and eventually network fracturing. However, when the  
590 crack is still small, linker binding may heal the crack before it spreads. Therefore, there is a  
591 critical crack size that is on the verge of becoming unstable. For systems below this critical  
592 crack size, the network strength increases with the bond number as it becomes increasingly  
593 unlikely that all linkers simultaneously unbind. For large systems however, increasing the  
594 network size allows for more locations at which a crack can be initiated – causing a decrease  
595 in network strength. Combined, these two effects explain why we observe a biphasic  
596 dependence of network strength on system size, with a cross-over at a critical crack size  
597 (Extended Data Fig. 6a,b, see Refs.<sup>5,6</sup> for a more detailed and quantitative explanation).

598 So why are catch bonds only effective for systems larger than the critical crack size? Catch  
599 bonds rely on bond redistribution to enhance the network strength (Extended Data Fig. 6c).  
600 The ‘dissociation-on-demand’ of unforced catch bonds increases the pool of unbound  
601 crosslinkers and thereby crosslinker binding in the entire network, causing a net crosslinker  
602 migration from stress-free to high-stress areas, as can be seen from the narrow force  
603 distribution (Fig. 3a). This increased binding in high-stress areas makes cracks less prone to  
604 becoming unstable (Fig. 3b), thus increasing the network strength. However, this effect relies  
605 on catch bonds to migrate from outside of the critical crack size towards the crack, and  
606 therefore only emerges in networks larger than the critical crack size.

607 Although it is difficult to precisely know the critical crack size for viscoelastic materials, any  
608 macroscopic network that can be studied with bulk rheology techniques is orders of  
609 magnitude above this size threshold<sup>5</sup>. Furthermore, laser ablation experiments have revealed  
610 that cells are also significantly larger than the critical crack size<sup>7</sup>. Therefore, we conclude that  
611 the catch bond advantage is general and should emerge both in cells and macroscopic  
612 networks. Lastly, as cell adhesion typically also relies on hundreds of linkers<sup>8</sup>, catch bonds  
613 likely also strengthen cell-cell and cell-matrix adhesions whilst simultaneously facilitating  
614 sliding. Therefore, our results could also explain why biological adhesins are very often catch  
615 bonds<sup>9</sup>.

616 **References**

- 617 Broedersz, C. P. *et al.* Cross-Link-Governed Dynamics of Biopolymer Networks. *Physical*  
618 *Review Letters* **105**, 238101 (2010).
- 619 Mulla, Y., Mackintosh, F. C. & Koenderink, G. H. Origin of Slow Stress Relaxation in the  
620 Cytoskeleton. *Physical Review Letters* **122**, 218102 (2019).
- 621 Mulla, Y., Wierenga, H., Alkemade, C., ten Wolde, P. R. & Koenderink, G. H. Frustrated  
622 binding of biopolymer crosslinkers. *Soft Matter* 3036–3042 (2019) doi:10.1039/c8sm02429d.
- 623 Griffith, A. A. The Phenomena of Rupture and Flow in Solids. *Philosophical Transactions of*  
624 *the Royal Society A: Mathematical, Physical and Engineering Sciences* **221**, 163–198  
625 (1921).
- 626 Mulla, Y., Oliveri, G., Overvelde, J. T. B. & Koenderink, G. H. Crack Initiation in Viscoelastic  
627 Materials. *Physical Review Letters* **120**, 268002 (2018).
- 628 Mulla, Y. & Koenderink, G. H. Crosslinker mobility weakens transient polymer networks.  
629 *Physical Review E* **98**, 062503 (2018).
- 630 Tinevez, J.-Y. *et al.* Role of cortical tension in bleb growth. *Proceedings of the National*  
631 *Academy of Sciences* **106**, 18581–18586 (2009).
- 632 Truong Quang, B.-A., Mani, M., Markova, O., Lecuit, T. & Lenne, P.-F. Principles of E-  
633 Cadherin Supramolecular Organization In Vivo. *Current Biology* **23**, 2197–2207 (2013).
- 634 Sokurenko, E. v., Vogel, V. & Thomas, W. E. Catch-Bond Mechanism of Force-Enhanced  
635 Adhesion: Counterintuitive, Elusive, but ... Widespread? *Cell Host and Microbe* **4**, 314–323  
636 (2008).
- 637
- 638

1 **Extended Data Figures**

2 **Weak catch bonds make strong networks**

3 Yuval Mulla<sup>1,2</sup>, Mario J Avellaneda<sup>1</sup>, Antoine Roland<sup>1</sup>, Lucia Baldauf<sup>1,3</sup>, Sander J Tans<sup>1,3\*</sup>, Gijsje H  
4 Koenderink<sup>1,3\*</sup>

5

6 <sup>1</sup> Living Matter Department, AMOLF, Amsterdam, The Netherlands

7 <sup>2</sup> Institute for Biological Physics, University of Cologne, Cologne, Germany

8 <sup>3</sup> Department of Bionanoscience, Kavli Institute of Nanoscience Delft, Delft University of Technology,  
9 Delft 2629HZ, the Netherlands

10 \*Correspondence to: [g.h.koenderink@tudelft.nl](mailto:g.h.koenderink@tudelft.nl), [tans@amolf.nl](mailto:tans@amolf.nl)

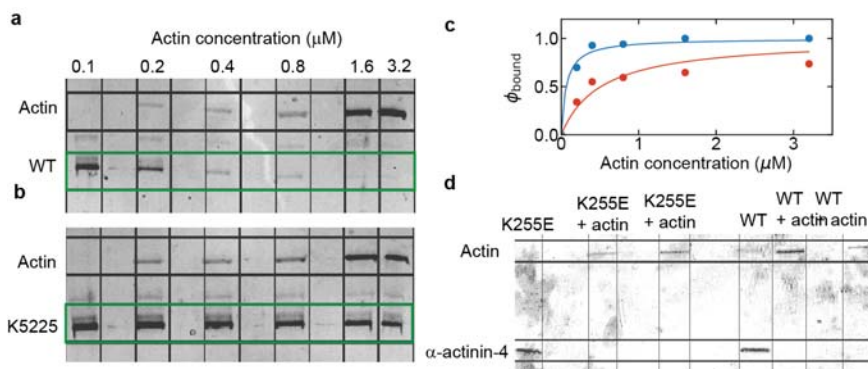

11

12 **Extended Data Fig. 1: High-speed co-sedimentation measurements of the affinity of  $\alpha$ -actinin-4 (WT) and**  
13 **K255E crosslinkers for actin filaments. a, b,** supernatant resulting from a high-speed centrifugation of a  
14 mixture of actin filaments and crosslinkers was run on an SDS-page gel. The bands on the bottom show the  $\alpha$ -  
15 actinin-4 (WT) or K255E (resp. **a** and **b**, molecular weight  $\sim 100$  kDa in both cases), while the bands on the top  
16 show actin (42 kDa). Each labeled column contained a different actin concentration as indicated. Some lanes  
17 were kept empty as spacers. The crosslinker concentration was fixed at  $0.1 \mu\text{M}$ . **c,** The fraction of bound  
18 crosslinkers, as determined from the co-sedimentation assay, as a function of the actin concentration was fit to  
19 the equation:  $\phi_{\text{bound}} = c_{\text{actin}}/K_a$ , where  $K_a$  is the affinity of the crosslinker. **d,** Consistent with the high affinity of  
20 both crosslinkers, SDS-page gels of supernatant resulting from a high-speed centrifugation of a crosslinked actin  
21 network at the concentration used in all our experiments ( $48 \mu\text{M}$  actin together with  $0.48 \mu\text{M}$  crosslinker) does not  
22 show any measurable fraction of unbound crosslinkers.

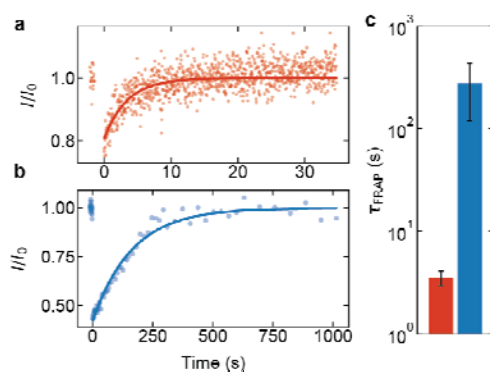

23

24 **Extended Data Fig. 2: Fluorescence recovery after photobleaching measurements reveal that  $\alpha$ -actinin-4**  
25 **crosslinkers are more dynamic than the K255E mutant.** Example fluorescence recovery curves of  $\alpha$ -actinin-4  
26 (a) and K255E (b) in the presence of 48  $\mu\text{M}$  actin show full recovery of both proteins after photobleaching at time  
27  $t=0$ , but with different timescales. The solid lines represent exponential fits to the data (see Methods). c, Average  
28 recovery time for  $\alpha$ -actinin-4 (red) and for K255E (blue), with the standard error on basis of 6 repeats per  
29 condition. Measurements were performed at 25  $^{\circ}\text{C}$ .



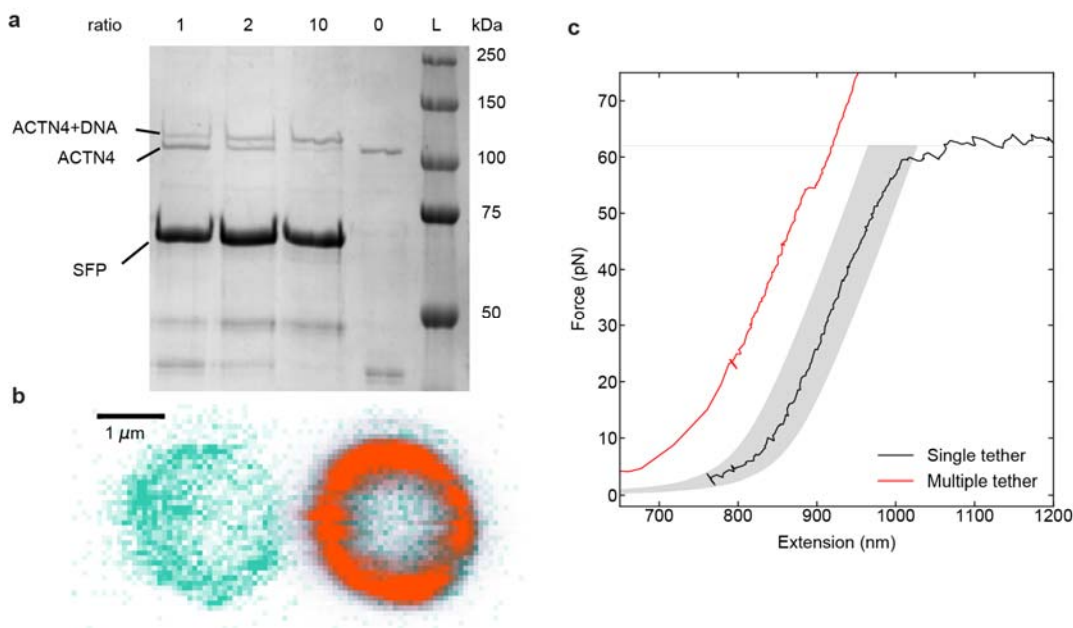

30

31 **Extended Data Fig. 3: Generation and classification of  $\alpha$ -actinin-4/actin tethers.** **a**, DNA was coupled to  $\alpha$ -  
32 actinin-4 (WT or K255E) using an SFP synthase-mediated reaction. Because  $\alpha$ -actinin-4 is a homodimer, the  
33 yBBr tag used for coupling is present in both monomers. To favour DNA attachment to only one monomer, we  
34 performed coupling reactions with several DNA titrations, and the coupling yields were quantified using SDS-  
35 PAGE gel electrophoresis. The DNA: $\alpha$ -actinin-4 molar ratios are indicated above each lane. At a molar ratio of  
36 1:1, most of the  $\alpha$ -actinin-4 is uncoupled, i.e. most dimers will be either not coupled or have only one monomer  
37 coupled to DNA. **b**, Concurrent confocal fluorescence images of a trapped bead coated with  $\alpha$ -actinin-4 (left) and  
38 a trapped bead coated with actin filaments (right). The bead's autofluorescence is depicted in green, and the  
39 fluorescent emission of Alexa Fluor 647-tagged actin is depicted in orange. **c**, Force-extension curves showing  
40 the overstretching regime of a single dsDNA tether (black), and a case where the two beads are linked by multiple  
41 tethers, which yields a shorter contour length and higher forces without unzipping (red). Variability in bead radii  
42 and actin layer thickness results in force-extension curves that can be shifted along the Extension axis, from the  
43 theoretical 850 nm by  $\pm 30$  nm. Grey area: "single-tether region". Tethers with a force-extension curve within this  
44 area that broke in a single step were regarded as single tethers and hence included in measuring the force-  
45 dependent lifetime.

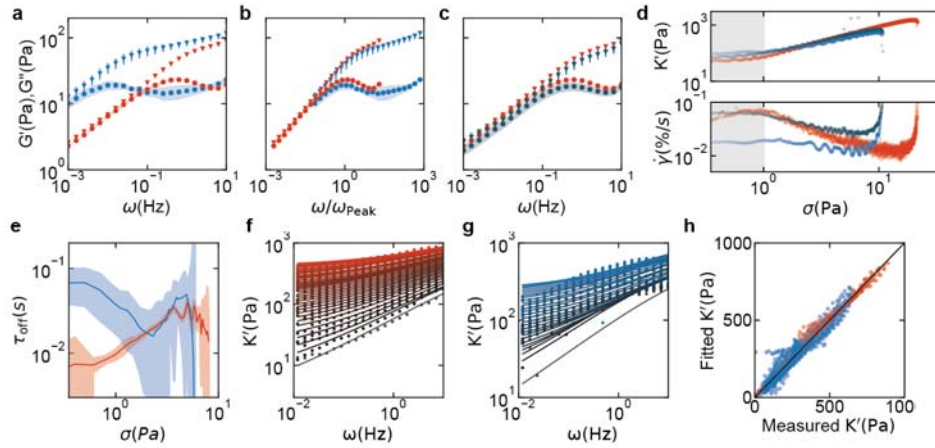

46

47 **Extended Data Fig. 4: Nonlinear and temperature-dependent rheology of actin networks crosslinked by  $\alpha$ -**  
 48 **actinin-4 or K255E. a-c,** The storage (triangles) and loss moduli (circles) were measured using small amplitude  
 49 oscillatory shear. The moduli are shown as a function of frequency (a) and as a function of the frequency  
 50 normalized by the frequency at which the loss modulus peaks (b). The peak frequency is 0.5 Hz for  $\alpha$ -actinin-4  
 51 (red), and 0.01 Hz for the K255E mutant (light blue). Both curves are measured at  $10^\circ\text{C}$ . c, The time-dependent  
 52 rheology of actin networks is compared between  $\alpha$ -actinin-4 crosslinking at  $10^\circ\text{C}$  (red) and K255E crosslinking at  
 53  $25^\circ\text{C}$  (dark blue). The standard error indicated by bars and shaded regions is on basis of 4 repeats per condition.  
 54 The collapses in b and c show that the crosslinker unbinding kinetics, but not the network structure, is significantly  
 55 different for the different conditions (see Main Text). d, Representative example curves of the differential storage  
 56 modulus at 0.5 Hz (top) and of the strain rate (bottom) are plotted against the applied shear stress for actin  
 57 networks crosslinked by  $\alpha$ -actinin-4 WT at  $10^\circ\text{C}$  (red), K255E at  $10^\circ\text{C}$  (light blue) or K255E at  $25^\circ\text{C}$  (dark blue).  
 58 We define the rupture strain as the data point where  $K'$  peaks. e-h, We apply a semiflexible polymer network  
 59 model to fit the frequency-dependent differential elastic modulus as a function of prestress (see Methods). e,  
 60 Thus, we extract the crosslinker bound lifetime as a function of stress for both  $\alpha$ -actinin-4 (red) and the K255E  
 61 mutant (blue) at  $25^\circ\text{C}$ . The shaded areas represent the error on basis of the fits. The bound lifetime of the mutant  
 62 is significantly longer at low stress, but the lifetimes of catch and slip bonds become similar at high stress as the  
 63 bound lifetime of the catch bonds increases. The abrupt decay of bound lifetime in the K255E-crosslinked network  
 64 when the stress reaches 5 Pa is due to network fracturing. h, the fitted  $K'$  shows quantitative agreement with the  
 65 measured  $K'$  for both catch and slip bonds.

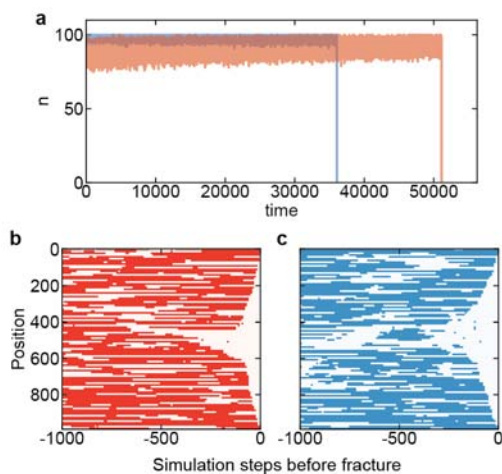

66

67 **Extended Data Fig. 5: Example simulation runs.** **a**, Time trace of the bound number of catch bonds (red) and  
68 slip bonds (blue) in a network undergoing a linearly increasing stress (see Extended Data Table 1 for  
69 parameters). As the catch bonds have faster dynamics than the slip bonds, a larger spread in the bound fraction  
70 is observed. After a long time of steady state fluctuations, the networks suddenly fracture as the number of linkers  
71 rapidly goes to 0. **b, c**, Kymographs showing at which positions there are bonds (red for catch bonds, blue for slip  
72 bonds) or no bonds (white). At steady state, linkers continuously bind and unbind (-1000 to approximately -300  
73 steps). Cracks can spontaneously initiate and propagate through the network (the last ~300 steps of the  
74 simulation) for both catch and slip bonds in a similar manner.

| Figure(s)                           | $\sigma$ | $\dot{\sigma}$ | $N$     | $k_1$            | $k_2$      |
|-------------------------------------|----------|----------------|---------|------------------|------------|
| Fig. 2d, Extended Data Fig. 6c-d, 8 | NA       | $10^{-5}$      | 100     | $10^{-2}$        | $10^{-1}$  |
| Fig. 3a-b                           | 0.3      | NA             | $10^3$  | $10^{-2}$        | $10^{-1}$  |
| Extended Data Fig. 6a-b             | NA       | $10^{-5}$      | 1 – 100 | $10^{-2}$        | $10^{-1}$  |
| Extended Data Fig. 7a               | NA       | $10^{-5}$      | 100     | $10^{-2} - 10^1$ | $10 * k_1$ |

75

76

**Extended Data Table 1: Table of parameters used for network simulations.** In all simulations, we use  $k_{on} =$

77

1,  $f_{1/e}^{slip} = 1$  and  $f_{1/e}^{catch} = 0.5$ . The applied stress ( $\sigma$ ), stress rate ( $\dot{\sigma}$ ), number of crosslinkers ( $N$ ) and bond affinities

78

( $k_1$  and  $k_2$ ) varied for different simulations as shown in this table. For catch bonds (red in all graphs) and strong

79

(low temperature) slip bonds (dark blue in all graphs), we used  $k_{off,0}^{slip} = k_1$ . For weak (high temperature) slip bonds

80

(light blue in all graphs), we use  $k_{off,0}^{slip} = k_2$ . Lastly,  $k_{off,0}^{catch} = k_2$  for catch bonds and  $k_{off,0}^{catch} = 0$  for both strong and

81

weak slip bonds. NA stands for 'Not Applicable'. All units are dimensionless as explained in the methods.

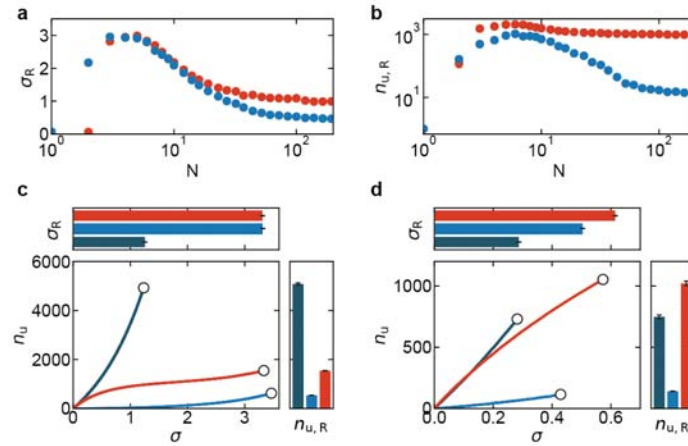

82

83 **Extended Data Fig. 6: Simulations show that catch bonds only provide a mechanical advantage over slip**  
 84 **bonds when they are mobile and present in sufficiently large numbers.** The system size dependence of the  
 85 rupture stress (a) and bond turnover at the point of rupture (b) reveals that catch bonds (red) are only stronger  
 86 than slip bonds (blue) for networks larger than  $\sim 10$  bonds, emphasizing that the increased network strength by  
 87 catch bonding is an emergent property (Supplementary Information). Each data point is the average of 10 repeats  
 88 and the standard errors are smaller than the symbol size. **c**, Catch bond-induced network strengthening is not  
 89 observed when crosslinkers are immobile and rebind in the same location from which they unbound. The bond  
 90 turnover as a function of stress reveals catch bonds (red) cause more dynamic materials (right), but do not  
 91 enhance strength (top) compared to strong slip bonds (light blue) and are less dynamic than networks consisting  
 92 of weak slip bonds (dark blue). The error bars represent the standard error on basis of 10 repeats per condition.  
 93 **d**, We also considered a three-state model where linkers are doubly bound, singly bound or unbound  
 94 (Supplementary Information "Three-state model"). Similar to the two-state model, the bond turnover as a function  
 95 of stress reveals that networks of catch bonds (red) are stronger and more deformable than networks of strong  
 96 slip bonds (light blue) or weak slip bonds (dark blue).

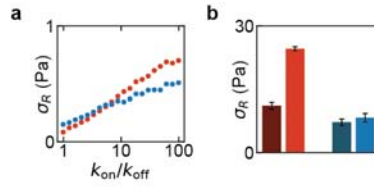

97

98 **Extended Data Fig. 7: Catch bonding is only effective when the binding rate is high.** a, Simulations of the  
99 rupture stress as a function of the binding rate  $k_{on}/k_{off}^{slip}$ , keeping  $k_{off,0}^{slip}/k_{off,0}^{catch}$  fixed (see Methods and Extended  
100 Data Table 1), shows that catch bonds (red) are only stronger than slip bonds (blue) when the binding rate is high.  
101 b, Enhancing the bond lifetime in experiments by decreasing the temperature from 25 °C (light) to 10 °C (dark)  
102 increases the rupture stress more steeply for wild type  $\alpha$ -actinin-4 (red) than for K255E (blue) as the catch bond  
103 advantage relies on bond redistribution and therefore on the binding rate (Main Text).

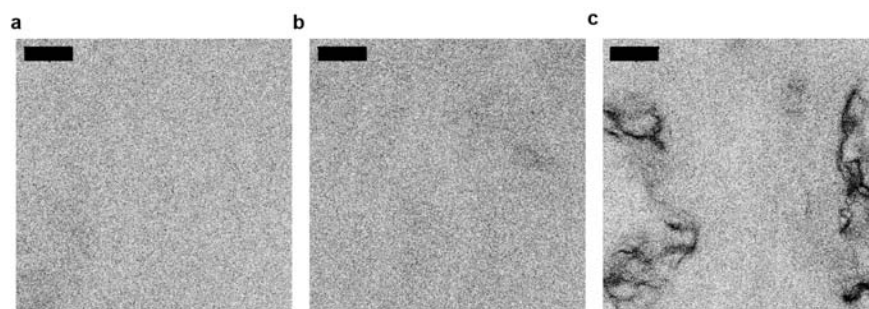

104

105 **Extended Data Fig. 8: Confocal fluorescence images of crosslinked actin networks.** At a 1:100  
106 crosslinker:actin molar ratio, the actin networks studied in this work are isotropic and spatially uniform, for both  
107 wild type (a) and K255E  $\alpha$ -actinin-4 (b). We do not observe any discernable structure because the mesh size is  
108  $\sim$ 200 nm, which is on the order of the diffraction limit, indicating that filaments are isotropically crosslinked rather  
109 than bundled. c, For comparison, actin bundle clusters were observed at a 1:25  $\alpha$ -actinin-4:actin molar ratio. The  
110 color coding was inverted for all images to improve the visual contrast between bundles and background. Scale  
111 bars are 20  $\mu$ m.
